# Supplementary material
Source: PubMed Central journal article supplement (PMC6372261)
Supplement: mmc1.pdf [file mmc1.pdf]

## Supplemental Data

### Efficient Variant Set Mixed Model Association

#### Tests for Continuous and Binary Traits

#### in Large-Scale Whole-Genome Sequencing Studies

Han Chen, Jennifer E. Huffman, Jennifer A. Brody, Chaolong Wang, Seunggeun Lee, Zilin Li, Stephanie M. Gogarten, Tamar Sofer, Lawrence F. Bielak, Joshua C. Bis, John Blangero, Russell P. Bowler, Brian E. Cade, Michael H. Cho, Adolfo Correa, Joanne E. Curran, Paul S. de Vries, David C. Glahn, Xiuqing Guo, Andrew D. Johnson, Sharon Kardia, Charles Kooperberg, Joshua P. Lewis, Xiaoming Liu, Rasika A. Mathias, Braxton D. Mitchell, Jeffrey R. O'Connell, Patricia A. Peyser, Wendy S. Post, Alex P. Reiner, Stephen S. Rich, Jerome I. Rotter, Edwin K. Silverman, Jennifer A. Smith, Ramachandran S. Vasan, James G. Wilson, Lisa R. Yanek, NHLBI Trans-Omics for Precision Medicine (TOPMed) Consortium, TOPMed Hematology and Hemostasis Working Group, Susan Redline, Nicholas L. Smith, Eric Boerwinkle, Ingrid B. Borecki, L. Adrienne Cupples, Cathy C. Laurie, Alanna C. Morrison, Kenneth M. Rice, and Xihong Lin

## Supplemental Data

### Supplemental Figures

Figure S1. Empirical power of mixed model based SMMAT-B (B), SMMAT-S (S), SMMAT-O (O), SMMAT-E (E) and GLMM-MiST (M) in the presence of large genetic effects. The total sample size was 2,000, and all genetic variants were causal, with effects in the same direction. (A) Power at the significance level of  $2.5 \times 10^{-6}$  for continuous traits in linear mixed models. (B) Power at the significance level of  $2.5 \times 10^{-6}$  for binary traits in logistic mixed models. (C) P value comparison of SMMAT-E and GLMM-MiST for continuous traits in linear mixed models. (D) P value comparison of SMMAT-E and GLMM-MiST for binary traits in logistic mixed models.

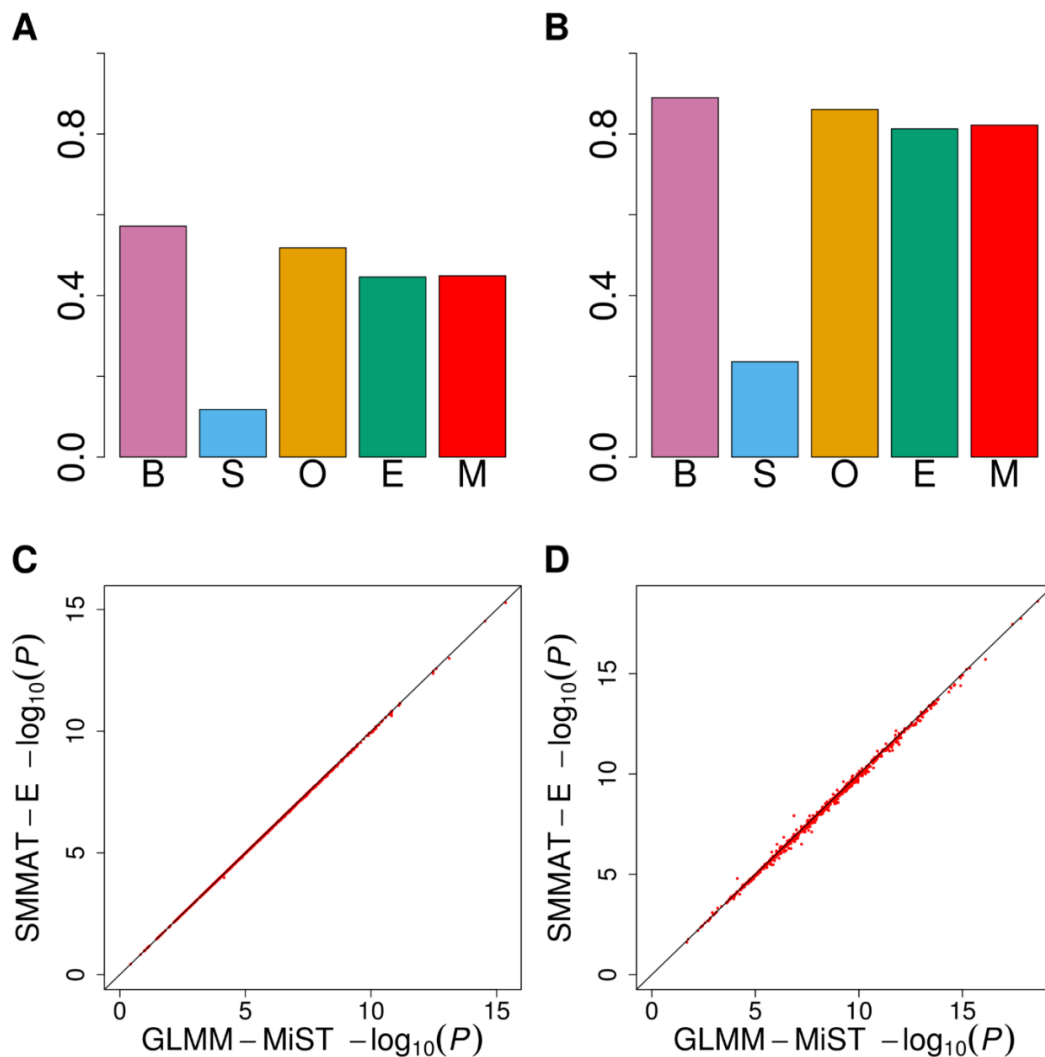

Figure S2. Quantile-quantile plots of SMMAT-B, SMMAT-S, SMMAT-O and SMMAT-E in the analysis of 10,000 samples in the presence of both population-level and familial random effects, under the null hypothesis of no genetic association. (A) Continuous traits in linear mixed models with GRM random effects and no ancestry PC adjustment. (B) Binary traits in logistic mixed models with GRM random effects and no ancestry PC adjustment. (C) Continuous traits in linear mixed models with GRM random effects and 10 ancestry PCs. (D) Binary traits in logistic mixed models with GRM random effects and 10 ancestry PCs. (E) Continuous traits in linear mixed models with GRM and population random effects, but no ancestry PC adjustment. (F) Binary traits in logistic mixed models with GRM and population random effects, but no ancestry PC adjustment.

**A**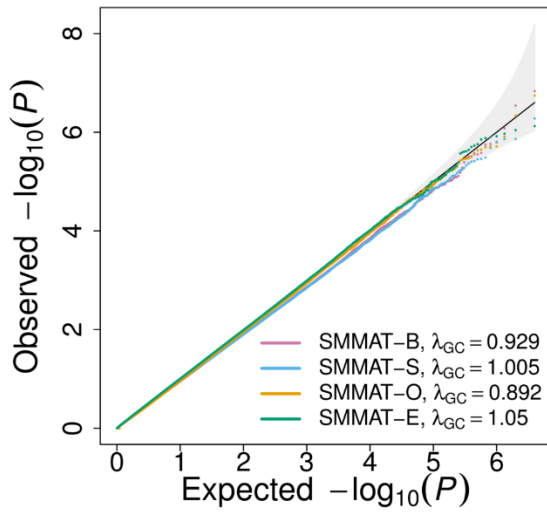**B**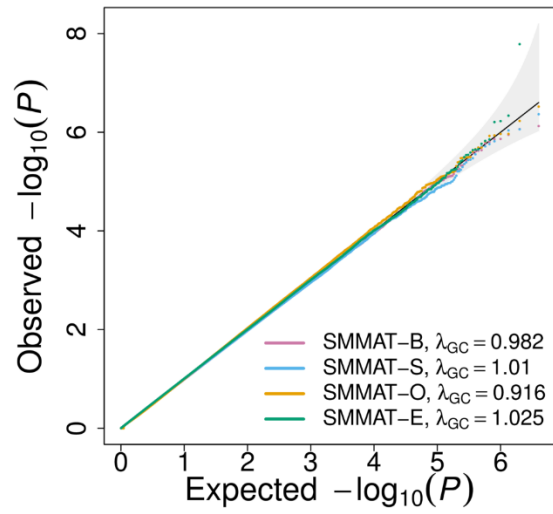**C**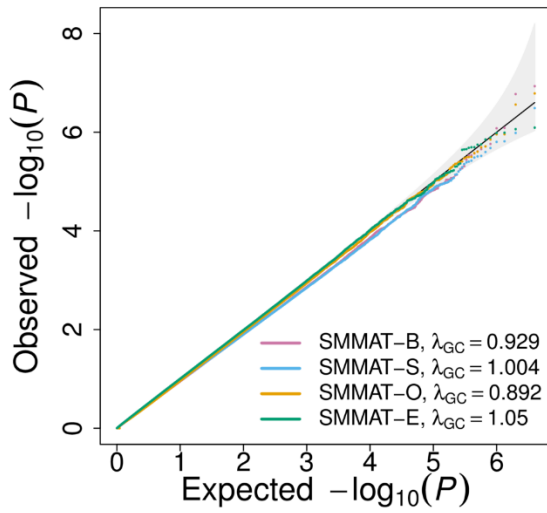**D**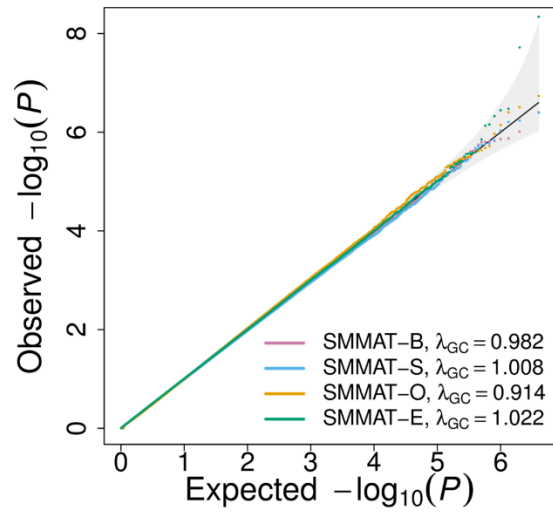**E**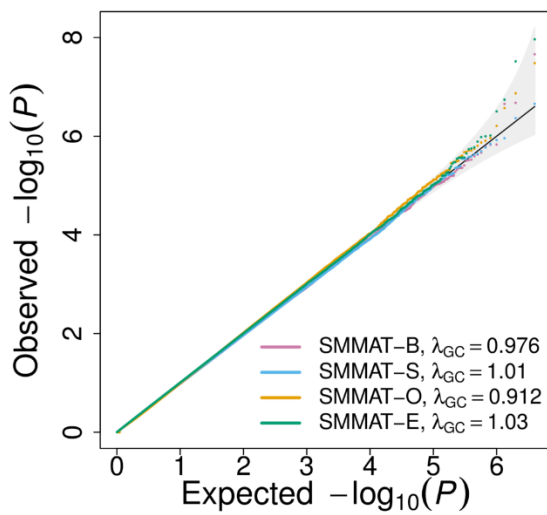**F**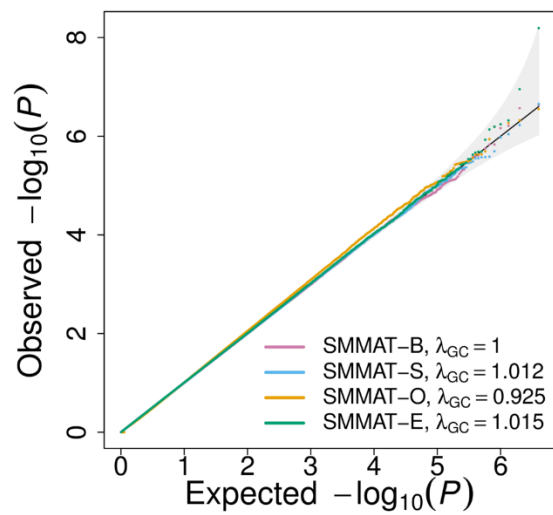

Figure S3. Empirical power of linear mixed model based SMMAT-B (B), SMMAT-S (S), SMMAT-O (O) and SMMAT-E (E) in continuous trait analysis of 5,000 samples, using three models: GRM random effects with no ancestry PC adjustment (1 RE no PC), GRM random effects with 10 ancestry PCs as fixed effects (1 RE 10 PC), GRM and population random effects with no ancestry PC adjustment (2 RE no PC). (A) 10% causal variants with 100% negative effects. (B) 10% causal variants with 80% negative effects. (C) 10% causal variants with 50% negative effects. (D) 20% causal variants with 100% negative effects. (E) 20% causal variants with 80% negative effects. (F) 20% causal variants with 50% negative effects. (G) 50% causal variants with 100% negative effects. (H) 50% causal variants with 80% negative effects. (I) 50% causal variants with 50% negative effects. Effect sizes were simulated using the same parameter in each row, but different across rows.

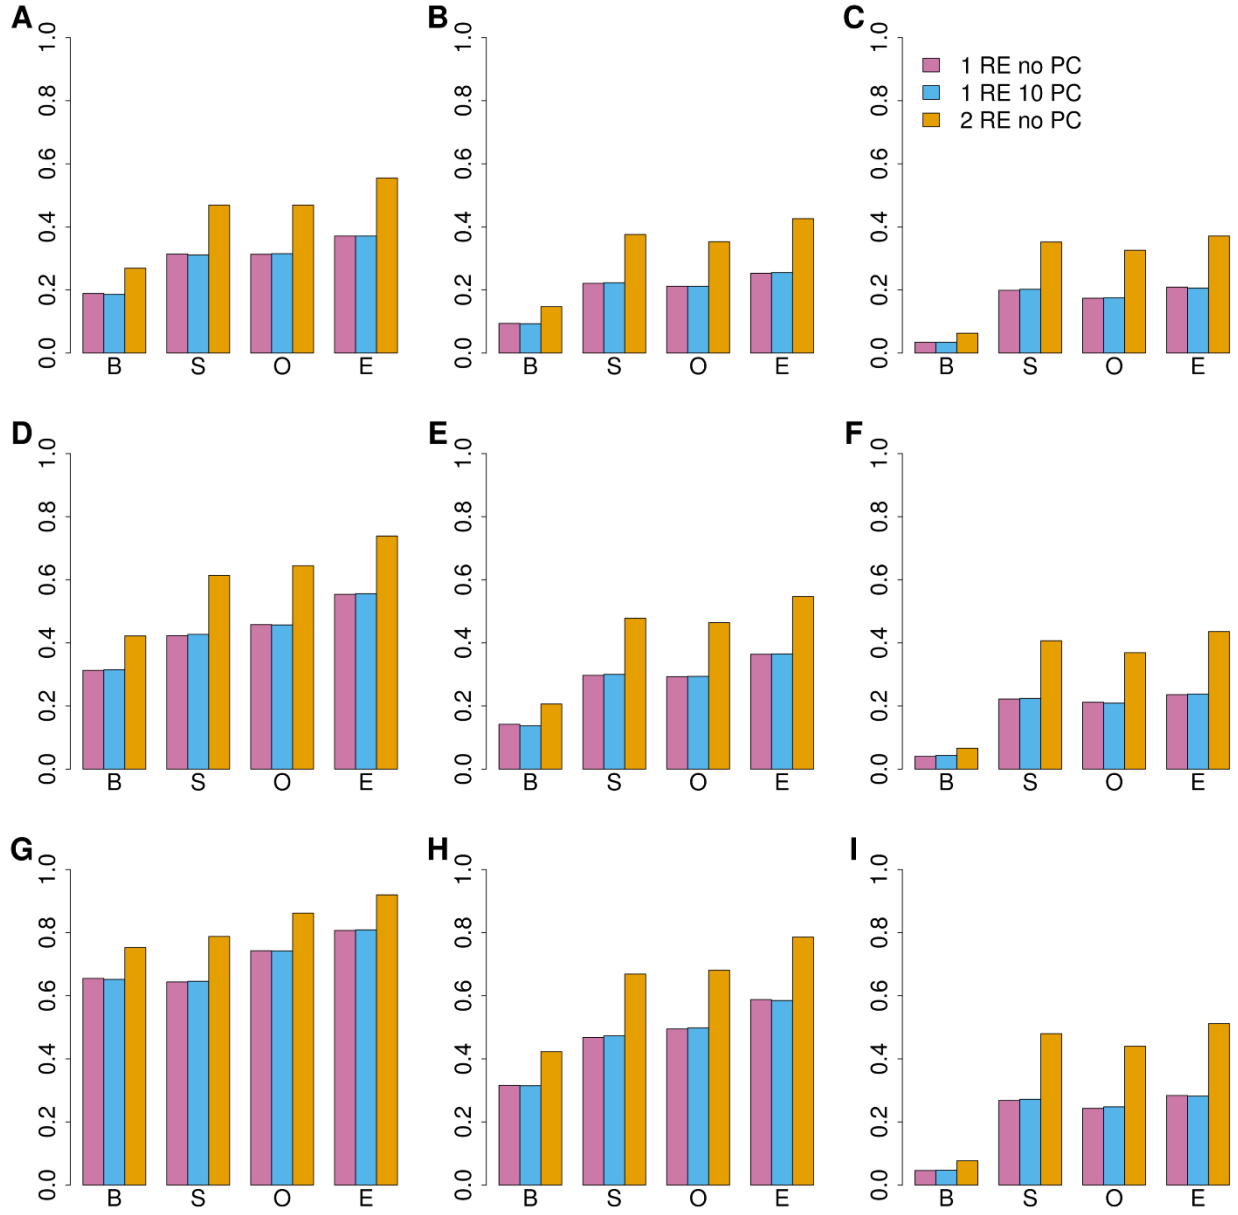

Figure S4. Empirical power of logistic mixed model based SMMAT-B (B), SMMAT-S (S), SMMAT-O (O) and SMMAT-E (E) in binary trait analysis of 5,000 samples, using three models: GRM random effects with no ancestry PC adjustment (1 RE no PC), GRM random effects with 10 ancestry PCs as fixed effects (1 RE 10 PC), GRM and population random effects with no ancestry PC adjustment (2 RE no PC). (A) 10% causal variants with 100% negative effects. (B) 10% causal variants with 80% negative effects. (C) 10% causal variants with 50% negative effects. (D) 20% causal variants with 100% negative effects. (E) 20% causal variants with 80% negative effects. (F) 20% causal variants with 50% negative effects. (G) 50% causal variants with 100% negative effects. (H) 50% causal variants with 80% negative effects. (I) 50% causal variants with 50% negative effects. Effect sizes were simulated using the same parameter in each row, but different across rows.

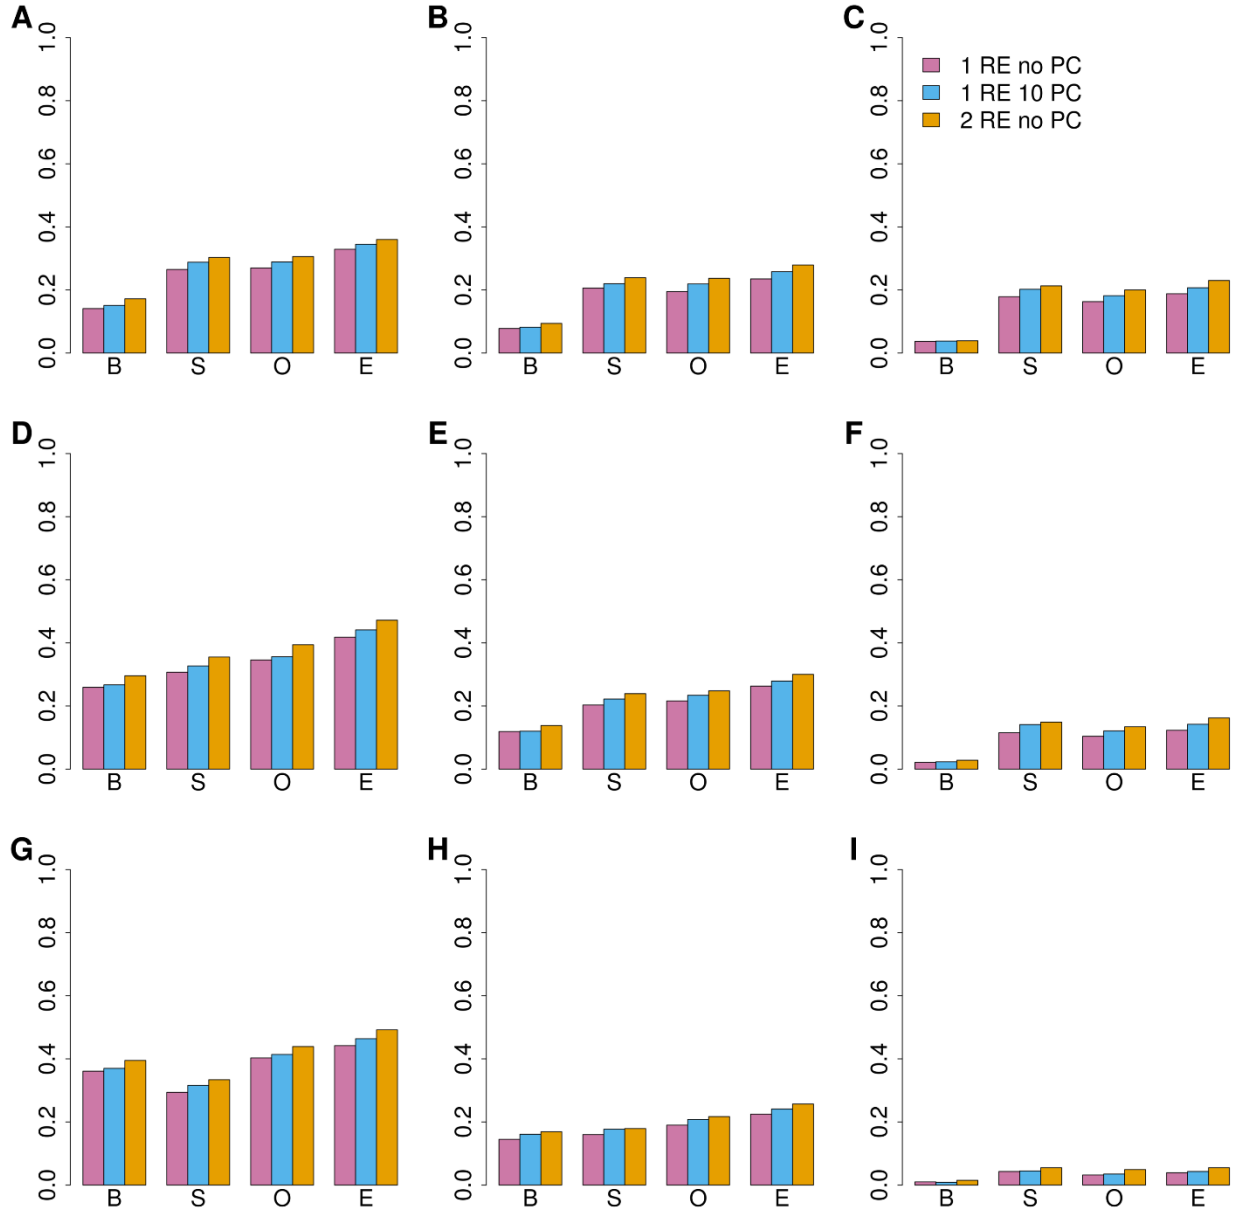



Figure S5. P value comparison of TOPMed fibrinogen level SMMAT analysis results using heteroscedastic linear mixed models with and without adjusting for 10 ancestry PCs as fixed effects, using rare variants with MAF < 5% in non-overlapping 4 kb sliding windows on chromosome 4 (n = 23,763). (A) SMMAT-B. (B) SMMAT-S. (C) SMMAT-O. (D) SMMAT-E.

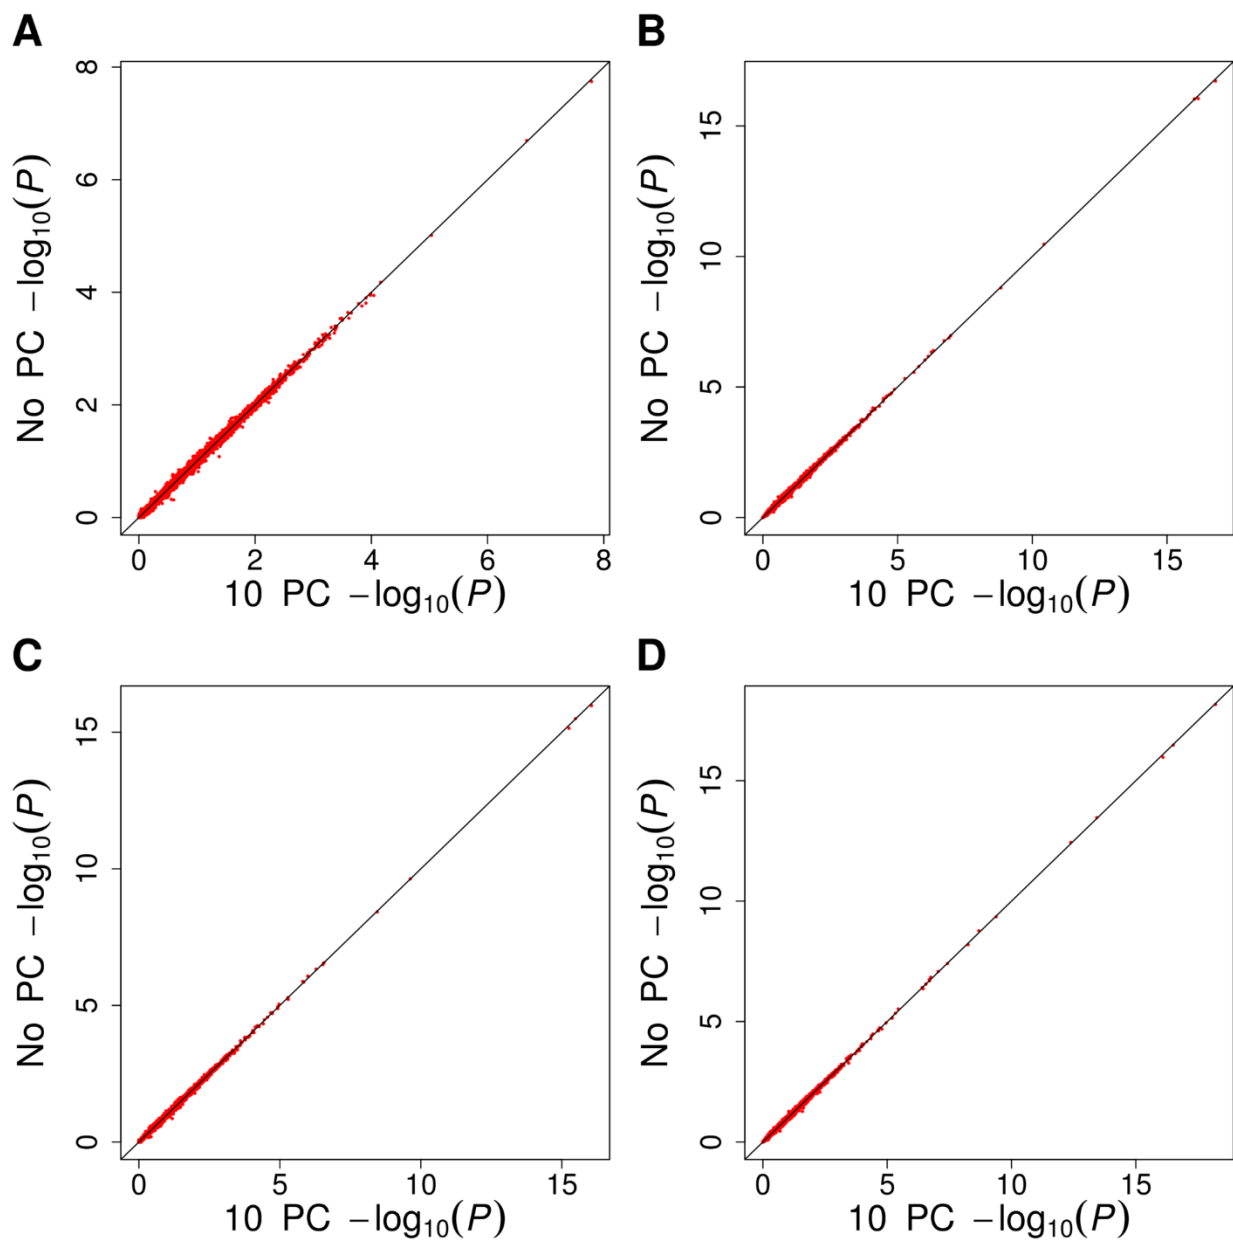

Figure S6. TOPMed fibrinogen level SMMAT analysis results using a heteroscedastic linear mixed model on rare variants with  $MAF < 5\%$  in non-overlapping 1 kb sliding windows on chromosome 4 ( $n = 23,763$ ). (A) Quantile-quantile plot. (B) P values on the log scale versus physical positions of the windows on chromosome 4 (build hg38).

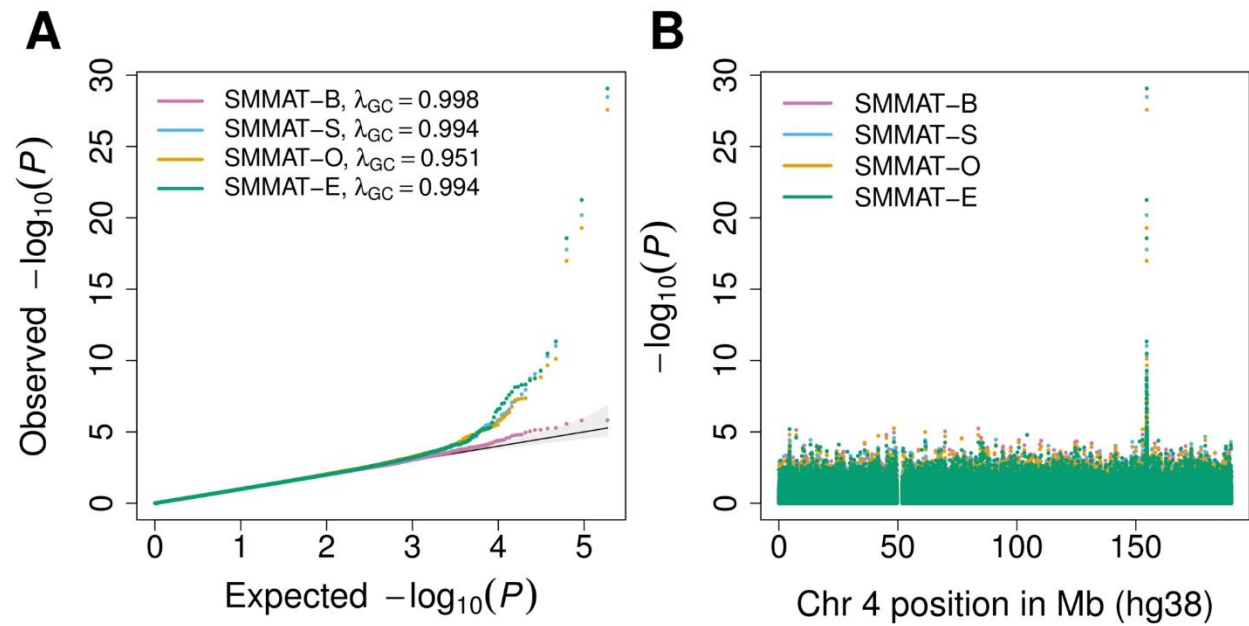

Figure S7. TOPMed fibrinogen level SMMAT analysis results using a heteroscedastic linear mixed model on rare variants with  $MAF < 5\%$  in non-overlapping 10 kb sliding windows on chromosome 4 ( $n = 23,763$ ). (A) Quantile-quantile plot. (B) P values on the log scale versus physical positions of the windows on chromosome 4 (build hg38).

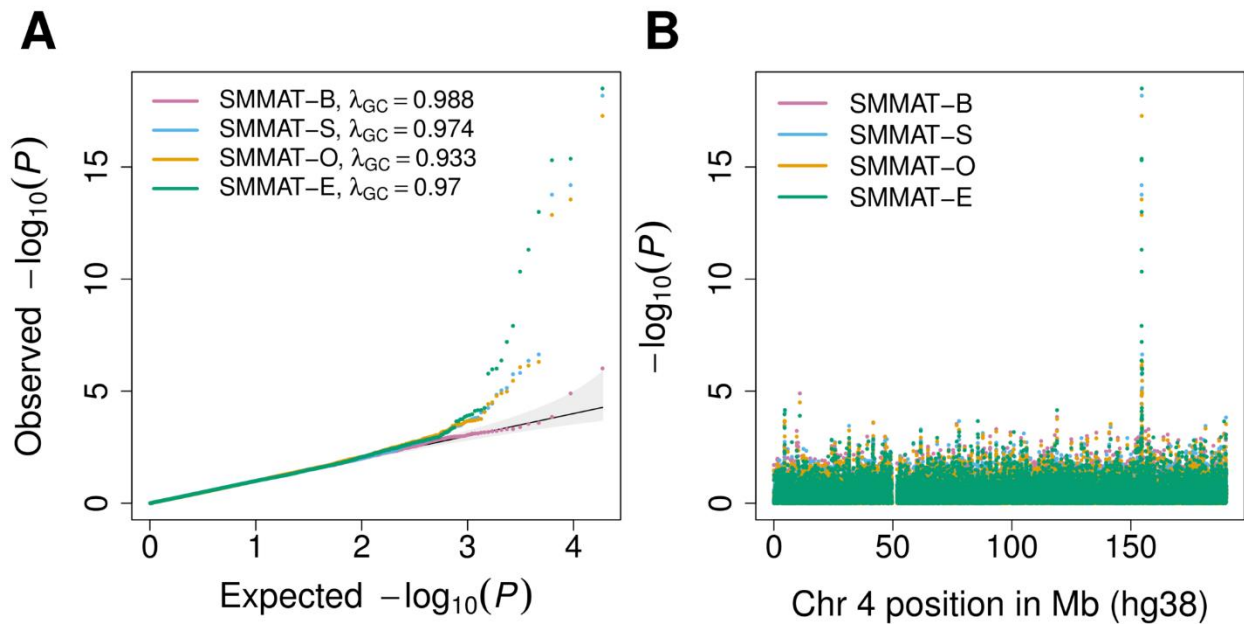

Figure S8. TOPMed fibrinogen level SMMAT analysis results using a heteroscedastic linear mixed model on rare variants with  $MAF < 5\%$  in non-overlapping 40 kb sliding windows on chromosome 4 ( $n = 23,763$ ). (A) Quantile-quantile plot. (B) P values on the log scale versus physical positions of the windows on chromosome 4 (build hg38).

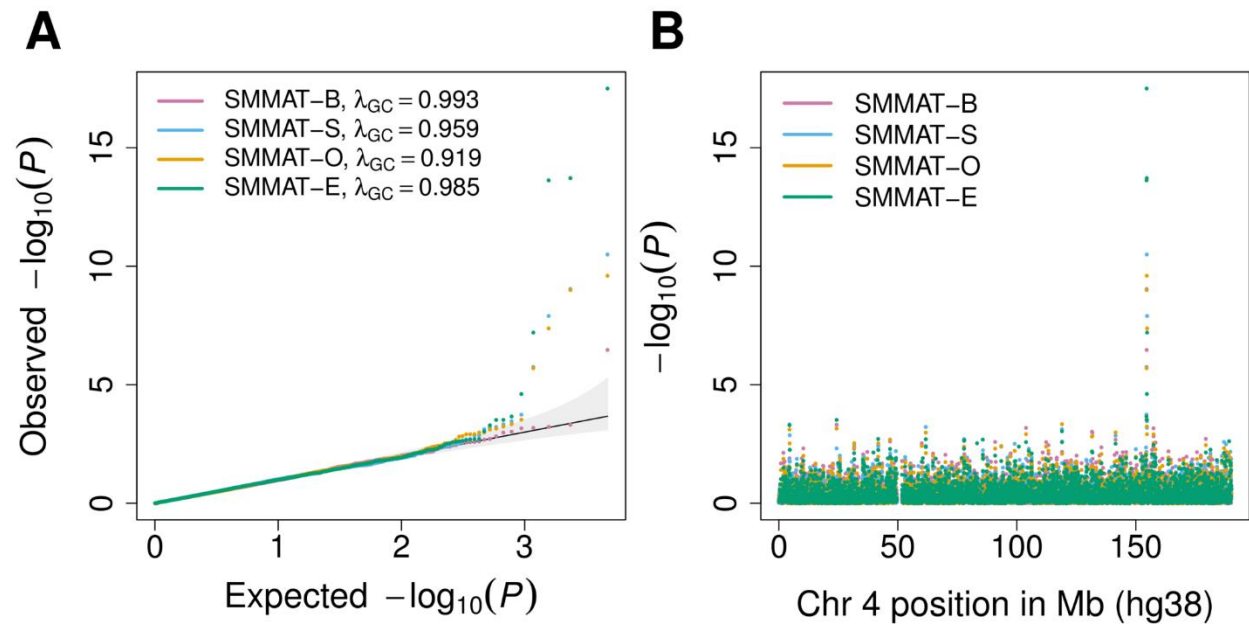

## Supplemental Tables

Table S1. TOPMed fibrinogen level SMMAT p values covering two known association variants rs6054 (hg38 position 154,568,456) and rs201909029 (hg 38 position 154,567,636) in gene *FGB* on chromosome 4, using a heteroscedastic linear mixed model on rare variants with MAF < 5% (n = 23,763). Physical positions of each window are on build hg38.

| Window (kb)                  | Length | No. of variants | SMMAT-B              | SMMAT-S               | SMMAT-O               | SMMAT-E               |
|------------------------------|--------|-----------------|----------------------|-----------------------|-----------------------|-----------------------|
| 154,567-154,568 <sup>a</sup> | 1 kb   | 78              | 0.097                | 0.0047                | 0.0076                | 0.0086                |
| 154,568-154,569 <sup>b</sup> | 1 kb   | 86              | $8.1 \times 10^{-5}$ | $1.7 \times 10^{-18}$ | $1.0 \times 10^{-17}$ | $2.7 \times 10^{-19}$ |
| 154,566-154,570              | 4 kb   | 309             | $1.6 \times 10^{-8}$ | $9.7 \times 10^{-17}$ | $3.3 \times 10^{-16}$ | $3.1 \times 10^{-17}$ |
| 154,560-154,570              | 10 kb  | 846             | 0.0011               | $1.7 \times 10^{-14}$ | $1.4 \times 10^{-13}$ | $4.3 \times 10^{-16}$ |
| 154,560-154,600              | 40 kb  | 3,399           | $3.4 \times 10^{-7}$ | $9.2 \times 10^{-10}$ | $1.0 \times 10^{-9}$  | $3.2 \times 10^{-18}$ |

<sup>a</sup> This window covers rs201909029, which has 33 minor allele counts in our TOPMed samples.

<sup>b</sup> This window covers rs6054, which has 179 minor allele counts in our TOPMed samples.

## Supplemental Methods: Additional Simulation Studies

### Impact of Large Genetic Effects on SMMAT-E Power

The efficient hybrid test SMMAT-E is developed based on the assumption that the mean of genetic effects  $\beta_0$  is not large. To investigate the impact of large genetic effects on SMMAT-E power, we performed additional simulation studies in which all variants in a test unit are causal, with the effects in the same direction. This simulation setting is in favor of SMMAT-B. We used the same genotype data as that in the single-cohort type I error simulations and evaluated the empirical power of SMMAT-B, SMMAT-S, SMMAT-O, SMMAT-E, and GLMM-MiST that combines the p value of SMMAT-B (Equation 2 in Methods) and the p value of SMMAT-S (Equation 3 in Methods) using Fisher's method. All tests were performed using weights equal to a beta distribution density function with parameters 1 and 25 on the MAF of each variant.

For continuous traits, we simulated the phenotype  $y_{ij}$  for individual  $j$  in family  $i$  from

$$y_{ij} = \alpha_1 Z_i + \beta_0 T_{ij} + b_{ij} + \epsilon_{ij},$$

where  $\alpha_1 = 1$ , the population indicator  $Z_i = 1$  if family  $i$  was from Population 1, and  $Z_i = 0$  if from Population 2, the genetic effect  $\beta_0 = 0.15$ . The burden score  $T_{ij}$  of individual  $j$  in family  $i$  was the weighted sum of causal variant genotypes (with weights equal to a beta distribution density function with parameters 1 and 25 on the MAF of each variant), normalized to have mean 0 and variance 1. The familial random effects  $b_{ij}$  were simulated using Equation 5 in Methods, and the random error  $\epsilon_{ij} \sim N(0, 1)$ . In this parameter setting, the burden score  $T_{ij}$  explains 1.3% of the total phenotypic variance. We randomly sampled 35% individuals from Population 1, and 65% individuals from Population 2.

For binary traits, we simulated the phenotype  $y_{ij}$  for individual  $j$  in family  $i$  from

$$\log\left(\frac{P(y_{ij} = 1)}{1 - P(y_{ij} = 1)}\right) = \alpha_0 + \beta_0 T_{ij} + b_{ij},$$

where  $\alpha_0$  was chosen such that the disease prevalence was 0.01 in all populations, the genetic effect  $\beta_0 = 0.3$ . The burden score  $T_{ij}$  of individual  $j$  in family  $i$  was calculated in the same way as for continuous traits, and the familial random effects  $b_{ij}$  were simulated using Equation 5 in Methods. We randomly sampled 35% individuals (with 25% cases and 10% controls out of the total sample size) from Population 1, and 65% individuals (with 25% cases and 40% controls out of the total sample size) from Population 2 to form a hypothetical study with balanced cases and controls in combined populations.

We used the sample size of 2,000 for both continuous and binary traits, since the simulated genetic effect was large. We repeated 1,000 simulation replicates, and compared the empirical power at the significance level of  $2.5 \times 10^{-6}$ , as well as the p values from SMMAT-E and GLMM-MiST (Figure S1).

### **Impact of Multiple Random Effects**

One advantage of the SMMAT framework is that it can flexibly use multiple random effects to model between-subject correlation from different sources in the model. We considered two sources of genetic relatedness in our simulation, one from population structure and one from family membership. The population membership matrix has 400 population blocks corresponding to the  $20 \times 20$  grid in Figure 1A, with elements equal to 1 if two individuals are from the same population grid, 0 otherwise. We included a population-level random intercept with mean 0 and variance 1, which is the same for individuals from the same population grid, in the true models for both

continuous and binary traits. We also included the familial random effects from Equation 5 in Methods.

We evaluated the performance of three analytical strategies in the presence of sample correlation due to both population-level and familial random effects: 1) including a single random effects term with the covariance matrix proportional to the GRM, without adjusting for ancestry PCs; 2) including a single random effects term with the covariance matrix proportional to the GRM, and adjusting for the first 10 ancestry PCs as fixed effects; and 3) including two random effects terms, one with the covariance matrix proportional to the GRM, and the other with the covariance matrix proportional to the block-diagonal population membership matrix, without adjusting for ancestry PCs. We evaluated the type I error rate and power as described in Methods.



## **Supplemental Acknowledgments**

**TOPMed.** Whole genome sequencing (WGS) for the Trans-Omics in Precision Medicine (TOPMed) program was supported by the National Heart, Lung and Blood Institute (NHLBI). WGS for “NHLBI TOPMed: Genetics of Cardiometabolic Health in the Amish” (phs000956.v1.p1) was performed at the Broad Institute of MIT and Harvard (3R01HL121007-01S1). WGS for “NHLBI TOPMed: The Cleveland Family Study” (phs000954.v1.p1) was performed at the University of Washington Northwest Genomics Center (3R01HL098433-05S1). WGS for “NHLBI TOPMed: Genetic Epidemiology of COPD (COPDGene)” (phs000951.v1.p1) was performed at the University of Washington Northwest Genomics Center (3R01HL089856-08S1). WGS for “NHLBI TOPMed: The Framingham Heart Study” (phs000974.v1.p1) was performed at the Broad Institute of MIT and Harvard (HHSN268201500014C). WGS for “NHLBI TOPMed: The Jackson Heart Study” (phs000964.v1.p1) was performed at the University of Washington Northwest Genomics Center (HHSN268201100037C). WGS for “NHLBI TOPMed: San Antonio Family Study” (phs001215.v1.p1) was performed at Illumina Genomic Service (R01HL113323). WGS for “NHLBI TOPMed: Atherosclerosis Risk in Communities” (phs001211.v1.p1) was performed at the Baylor College of Medicine Human Genome Sequencing Center (HHSN268201500015C and 3U54HG003273-12S2) and the Broad Institute of MIT and Harvard (3R01HL092577-06S1). WGS for “NHLBI TOPMed: Genetic Studies of Atherosclerosis Risk (GeneSTAR)” (phs001218.v1.p1) were performed at Illumina Inc., Macrogen Corp., and the Broad Institute of MIT and Harvard (3R01HL121007-01S1, HHSN268201500014C, 3R01HL092577-06S1). WGS for “NHLBI TOPMed: Genetic Epidemiology Network of Arteriopathy” (phs001345.v1.p1) was performed at the University of Washington Northwest Genomics Center for the HyperGen/GENOA project (HL055673, PI: Donna Arnett/HL119443,

PI: Sharon Kardia) and the Broad Institute of MIT and Harvard for the AA-CAC project (PI: Kent Taylor). WGS for “NHLBI TOPMed: Multi-Ethnic Study of Atherosclerosis (MESA)” (phs001416.v1.p1) was performed at the Broad Institute of MIT and Harvard (3U54HG003067-13S1). WGS for “NHLBI TOPMed: Women’s Health Initiative” (phs001237.v1.p1) was performed at the Broad Institute of MIT and Harvard (HHSN268201500014C). Centralized read mapping and genotype calling, along with variant quality metrics and filtering were provided by the TOPMed Informatics Research Center (3R01HL-117626-02S1). Phenotype harmonization, data management, sample-identity QC, and general study coordination, were provided by the TOPMed Data Coordinating Center (3R01HL-120393-02S1). We gratefully acknowledge the studies and participants who provided biological samples and data for TOPMed.

**Old Order Amish Study (Amish).** The Amish studies upon which these data are based were supported by NIH grants R01 AG18728, U01 HL072515, R01 HL088119, R01 HL121007, and P30 DK072488. See publication: PMID: 18440328.

**Cleveland Family Study (CFS).** Support for the Cleveland Family Study was provided by NHLBI grants R01 HL46380, R01 HL113338, and 1R35HL135818.

**Genetic Epidemiology of COPD Study (COPDGene).** This research used data generated by the COPDGene study, which was supported by NIH grants U01 HL089856 and U01 HL089897 from the National Heart, Lung, and Blood Institute. The COPDGene project is also supported by the COPD Foundation through contributions made to an Industry Advisory Board comprised of

AstraZeneca, Boehringer Ingelheim, GlaxoSmithKline, Novartis, Pfizer, Siemens and Sunovion.  
A full listing of COPDGene investigators can be found at: <http://www.copdgene.org/directory>.

**Framingham Heart Study (FHS).** The Framingham Heart Study has been supported by contracts N01-HC-25195 and HHSN268201500001I and grant R01 HL092577. Fibrinogen measurement was supported by NIH R01-HL-48157. The Framingham Heart Study thanks the study participants and the multitude of investigators who over its 70 year history continue to contribute so much to further our knowledge of heart, lung, blood and sleep disorders and associated traits.

**Jackson Heart Study (JHS).** The Jackson Heart Study (JHS) is supported and conducted in collaboration with Jackson State University (HHSN268201800013I), Tougaloo College (HHSN268201800014I), the Mississippi State Department of Health (HHSN268201800015I/HHSN26800001) and the University of Mississippi Medical Center (HHSN268201800010I, HHSN268201800011I and HHSN268201800012I) contracts from the National Heart, Lung, and Blood Institute (NHLBI) and the National Institute for Minority Health and Health Disparities (NIMHD). The authors also wish to thank the staff and participants of the JHS. Dr. Wilson is supported by U54GM115428 from the National Institute of General Medical Sciences.

**San Antonio Family Study (SAFS).** Collection of the San Antonio Family Study data was supported in part by National Institutes of Health (NIH) grants R01 HL045522, MH078143, MH078111 and MH083824; and whole genome sequencing of SAFS subjects was supported by

U01 DK085524 and R01 HL113323. We are very grateful to the participants of the San Antonio Family Study for their continued involvement in our research programs.

**Atherosclerosis Risk in Communities Study (ARIC).** The Atherosclerosis Risk in Communities study has been funded in whole or in part with Federal funds from the National Heart, Lung, and Blood Institute, National Institutes of Health, Department of Health and Human Services (contract numbers HHSN268201700001I, HHSN268201700002I, HHSN268201700003I, HHSN268201700004I and HHSN268201700005I). The authors thank the staff and participants of the ARIC study for their important contributions.

**Genetic Studies of Atherosclerosis Risk (GeneSTAR).** GeneSTAR was supported by grants from the National Institutes of Health/National Heart, Lung, and Blood Institute (U01 HL72518, HL087698, HL112064) and by a grant from the National Institutes of Health/National Center for Research Resources (M01-RR000052) to the Johns Hopkins General Clinical Research Center.

**Genetic Epidemiology Network of Arteriopathy (GENOA).** Support for GENOA was also provided by the National Heart, Lung and Blood Institute (HL054457, HL054464, HL054481, and HL087660) of the National Institutes of Health. We would also like to thank the GENOA participants.

**Multi-Ethnic Study of Atherosclerosis (MESA).** MESA and the MESA SHARe project are conducted and supported by the National Heart, Lung, and Blood Institute (NHLBI) in collaboration with MESA investigators. Support for MESA is provided by contracts

HHSN268201500003I, N01-HC-95159, N01-HC-95160, N01-HC-95161, N01-HC-95162, N01-HC-95163, N01-HC-95164, N01-HC-95165, N01-HC-95166, N01-HC-95167, N01-HC-95168, N01-HC-95169, UL1-TR-000040, UL1-TR-001079, UL1-TR-001420. The provision of genotyping data was supported in part by the National Center for Advancing Translational Sciences, CTSI grant UL1TR001881, and the National Institute of Diabetes and Digestive and Kidney Disease Diabetes Research Center (DRC) grant DK063491 to the Southern California Diabetes Endocrinology Research Center.

**Women's Health Initiative (WHI).** The WHI program is funded by the National Heart, Lung, and Blood Institute, National Institutes of Health, U.S. Department of Health and Human Services through contracts HHSN268201600018C, HHSN268201600001C, HHSN268201600002C, HHSN268201600003C, and HHSN268201600004C. The authors thank the WHI investigators and staff for their dedication and the study participants for making the program possible. A full listing of WHI investigators can be found at: <http://www.whi.org/researchers/Documents%20%20Write%20a%20Paper/WHI%20Investigator%20Long%20List.pdf>.

## Full Authorship List of the Trans-Omics for Precision Medicine (TOPMed) Consortium

| <b>Name</b>                            | <b>Institution(s)</b>                                                       |
|----------------------------------------|-----------------------------------------------------------------------------|
| Abe, Namiko                            | New York Genome Center                                                      |
| Abecasis, Goncalo                      | University of Michigan                                                      |
| Albert, Christine                      | Massachusetts General Hospital                                              |
| Allred, Nicholette (Nichole)<br>Palmer | Wake Forest Baptist Health                                                  |
| Almasy, Laura                          | Children's Hospital of Philadelphia, University of<br>Pennsylvania          |
| Alonso, Alvaro                         | Emory University                                                            |
| Ament, Seth                            | University of Maryland                                                      |
| Anderson, Peter                        | University of Washington                                                    |
| Anugu, Pramod                          | University of Mississippi                                                   |
| Applebaum-Bowden, Deborah              | National Institutes of Health                                               |
| Arking, Dan                            | Johns Hopkins University                                                    |
| Arnett, Donna K                        | University of Kentucky                                                      |
| Ashley-Koch, Allison                   | Duke University                                                             |
| Aslibekyan, Stella                     | University of Alabama                                                       |
| Assimes, Tim                           | Stanford University                                                         |
| Auer, Paul                             | University of Wisconsin Milwaukee                                           |
| Avramopoulos, Dimitrios                | Johns Hopkins University                                                    |
| Barnard, John                          | Cleveland Clinic                                                            |
| Barnes, Kathleen                       | University of Colorado at Denver                                            |
| Barr, R. Graham                        | Columbia University                                                         |
| Barron-Casella, Emily                  | Johns Hopkins University                                                    |
| Beaty, Terri                           | Johns Hopkins University                                                    |
| Becker, Diane                          | Johns Hopkins University                                                    |
| Becker, Lewis                          | Johns Hopkins University                                                    |
| Beer, Rebecca                          | National Heart, Lung, and Blood Institute, National Institutes<br>of Health |
| Begum, Ferdouse                        | Johns Hopkins University                                                    |
| Beitelshees, Amber                     | University of Maryland                                                      |
| Benjamin, Emelia                       | Boston University, Massachusetts General Hospital                           |
| Bezerra, Marcos                        | Fundação de Hematologia e Hemoterapia de Pernambuco -<br>Hemope             |
| Bielak, Larry                          | University of Michigan                                                      |
| Bis, Joshua                            | University of Washington                                                    |
| Blackwell, Thomas                      | University of Michigan                                                      |

| <b>Name</b>         | <b>Institution(s)</b>                                    |
|---------------------|----------------------------------------------------------|
| Blangero, John      | University of Texas Rio Grande Valley School of Medicine |
| Boerwinkle, Eric    | University of Texas Health at Houston                    |
| Borecki, Ingrid     | University of Washington                                 |
| Bowler, Russell     | National Jewish Health                                   |
| Brody, Jennifer     | University of Washington                                 |
| Broeckel, Ulrich    | Medical College of Wisconsin                             |
| Broome, Jai         | University of Washington                                 |
| Bunting, Karen      | New York Genome Center                                   |
| Burchard, Esteban   | University of California, San Francisco                  |
| Cardwell, Jonathan  | University of Colorado at Denver                         |
| Carty, Cara         | Women's Health Initiative                                |
| Casaburi, Richard   | University of California, Los Angeles                    |
| Casella, James      | Johns Hopkins University                                 |
| Chaffin, Mark       | The Broad Institute                                      |
| Chang, Christy      | University of Maryland                                   |
| Chasman, Daniel     | Brigham & Women's Hospital                               |
| Chavan, Sameer      | University of Colorado at Denver                         |
| Chen, Bo-Juen       | New York Genome Center                                   |
| Chen, Wei-Min       | University of Virginia                                   |
| Chen, Yii-Der Ida   | Los Angeles Biomedical Research Institute                |
| Cho, Michael        | Brigham & Women's Hospital                               |
| Choi, Seung Hoan    | The Broad Institute                                      |
| Chuang, Lee-Ming    | National Taiwan University                               |
| Chung, Mina         | Cleveland Clinic                                         |
| Cornell, Elaine     | University of Vermont                                    |
| Correa, Adolfo      | University of Mississippi                                |
| Crandall, Carolyn   | University of California, Los Angeles                    |
| Crapo, James        | National Jewish Health                                   |
| Cupples, L Adrienne | Boston University                                        |
| Curran, Joanne      | University of Texas Rio Grande Valley School of Medicine |
| Curtis, Jeffrey     | University of Michigan                                   |
| Custer, Brian       | Blood Systems Research Institute UCSF                    |
| Damcott, Coleen     | University of Maryland                                   |
| Darbar, Dawood      | University of Illinois at Chicago                        |
| Das, Sayantan       | University of Michigan                                   |
| David, Sean         | Stanford University                                      |
| Davis, Colleen      | University of Washington                                 |

| <b>Name</b>              | <b>Institution(s)</b>                                                    |
|--------------------------|--------------------------------------------------------------------------|
| Daya, Michelle           | University of Colorado at Denver                                         |
| de Andrade, Mariza       | Mayo Clinic                                                              |
| DeBaun, Michael          | Vanderbilt University                                                    |
| Deka, Ranjan             | University of Cincinnati                                                 |
| DeMeo, Dawn              | Brigham & Women's Hospital                                               |
| Devine, Scott            | University of Maryland                                                   |
| Do, Ron                  | Icahn School of Medicine at Mount Sinai                                  |
| Duan, Qing               | University of North Carolina                                             |
| Duggirala, Ravi          | University of Texas Rio Grande Valley School of Medicine                 |
| Durda, Peter             | University of Vermont                                                    |
| Dutcher, Susan           | Washington University in St Louis                                        |
| Eaton, Charles           | Brown University                                                         |
| Ekunwe, Lynette          | University of Mississippi                                                |
| Ellinor, Patrick         | Massachusetts General Hospital                                           |
| Emery, Leslie            | University of Washington                                                 |
| Farber, Charles          | University of Virginia                                                   |
| Farnam, Leanna           | Brigham & Women's Hospital                                               |
| Fingerlin, Tasha         | National Jewish Health                                                   |
| Flickinger, Matthew      | University of Michigan                                                   |
| Fornage, Myriam          | University of Texas Health at Houston                                    |
| Franceschini, Nora       | University of North Carolina                                             |
| Fu, Mao                  | University of Maryland                                                   |
| Fullerton, Stephanie M.  | University of Washington                                                 |
| Fulton, Lucinda          | Washington University in St Louis                                        |
| Gabriel, Stacey          | The Broad Institute                                                      |
| Gan, Weiniu              | National Heart, Lung, and Blood Institute, National Institutes of Health |
| Gao, Yan                 | University of Mississippi                                                |
| Gass, Margery            | Fred Hutchinson Cancer Research Center                                   |
| Gelb, Bruce              | Icahn School of Medicine at Mount Sinai                                  |
| Geng, Xiaoqi (Priscilla) | University of Michigan                                                   |
| Germer, Soren            | New York Genome Center                                                   |
| Gignoux, Chris           | Stanford University                                                      |
| Gladwin, Mark            | University of Pittsburgh                                                 |
| Glahn, David             | Yale University                                                          |
| Gogarten, Stephanie      | University of Washington                                                 |
| Gong, Da-Wei             | University of Maryland                                                   |



| <b>Name</b>            | <b>Institution(s)</b>                                                    |
|------------------------|--------------------------------------------------------------------------|
| Goring, Harald         | University of Texas Rio Grande Valley School of Medicine                 |
| Gu, C. Charles         | Washington University in St Louis                                        |
| Guan, Yue              | University of Maryland                                                   |
| Guo, Xiuqing           | Los Angeles Biomedical Research Institute                                |
| Haessler, Jeff         | Fred Hutchinson Cancer Research Center, Women's Health Initiative        |
| Hall, Michael          | University of Mississippi                                                |
| Harris, Daniel         | University of Maryland                                                   |
| Hawley, Nicola         | Yale University                                                          |
| He, Jiang              | Tulane University                                                        |
| Heavner, Ben           | University of Washington                                                 |
| Heckbert, Susan        | University of Washington                                                 |
| Hernandez, Ryan        | University of California, San Francisco                                  |
| Herrington, David      | Wake Forest Baptist Health                                               |
| Hersh, Craig           | Brigham & Women's Hospital                                               |
| Hidalgo, Bertha        | University of Alabama                                                    |
| Hixson, James          | University of Texas Health at Houston                                    |
| Hokanson, John         | University of Colorado at Denver                                         |
| Holly, Kramer          | Loyola University                                                        |
| Hong, Elliott          | University of Maryland                                                   |
| Hoth, Karin            | University of Iowa                                                       |
| Hsiung, Chao (Agnes)   | National Health Research Institute Taiwan                                |
| Huston, Haley          | Blood Works Northwest                                                    |
| Hwu, Chii Min          | Taichung Veterans General Hospital Taiwan                                |
| Irvin, Marguerite Ryan | University of Alabama                                                    |
| Jackson, Rebecca       | Ohio State University Wexner Medical Center                              |
| Jain, Deepti           | University of Washington                                                 |
| Jaquish, Cashell       | National Heart, Lung, and Blood Institute, National Institutes of Health |
| Jhun, Min A            | University of Michigan                                                   |
| Johnsen, Jill          | Blood Works Northwest, University of Washington                          |
| Johnson, Andrew        | National Heart, Lung, and Blood Institute, National Institutes of Health |
| Johnson, Craig         | University of Washington                                                 |
| Johnston, Rich         | Emory University                                                         |
| Jones, Kimberly        | Johns Hopkins University                                                 |
| Kang, Hyun Min         | University of Michigan                                                   |
| Kaplan, Robert         | Albert Einstein College of Medicine                                      |

| <b>Name</b>          | <b>Institution(s)</b>                                                    |
|----------------------|--------------------------------------------------------------------------|
| Kardia, Sharon       | University of Michigan                                                   |
| Kathiresan, Sekar    | The Broad Institute                                                      |
| Kaufman, Laura       | Brigham & Women's Hospital                                               |
| Kelly, Shannon       | Blood Systems Research Institute UCSF                                    |
| Kenny, Eimear        | Icahn School of Medicine at Mount Sinai                                  |
| Kessler, Michael     | University of Maryland                                                   |
| Khan, Alyna          | University of Washington                                                 |
| Kinney, Greg         | University of Colorado at Denver                                         |
| Konkle, Barbara      | Blood Works Northwest                                                    |
| Kooperberg, Charles  | Fred Hutchinson Cancer Research Center                                   |
| Krauter, Stephanie   | University of Washington                                                 |
| Lange, Christoph     | Harvard School of Public Health                                          |
| Lange, Ethan         | University of Colorado at Denver                                         |
| Lange, Leslie        | University of Colorado at Denver                                         |
| Laurie, Cathy        | University of Washington                                                 |
| Laurie, Cecelia      | University of Washington                                                 |
| LeBoff, Meryl        | Brigham & Women's Hospital                                               |
| Lee, Seunggeun Shawn | University of Michigan                                                   |
| Lee, Wen-Jane        | Taichung Veterans General Hospital Taiwan                                |
| LeFaive, Jonathon    | University of Michigan                                                   |
| Levine, David        | University of Washington                                                 |
| Levy, Dan            | National Heart, Lung, and Blood Institute, National Institutes of Health |
| Lewis, Joshua        | University of Maryland                                                   |
| Li, Yun              | University of North Carolina                                             |
| Lin, Honghuang       | Boston University                                                        |
| Lin, Keng Han        | University of Michigan                                                   |
| Liu, Simin           | Brown University, Women's Health Initiative                              |
| Liu, Yongmei         | Wake Forest Baptist Health                                               |
| Loos, Ruth           | Icahn School of Medicine at Mount Sinai                                  |
| Lubitz, Steven       | Massachusetts General Hospital                                           |
| Lunetta, Kathryn     | Boston University                                                        |
| Luo, James           | National Heart, Lung, and Blood Institute, National Institutes of Health |
| Mahaney, Michael     | University of Texas Rio Grande Valley School of Medicine                 |
| Make, Barry          | Johns Hopkins University                                                 |
| Manichaikul, Ani     | University of Virginia                                                   |

| <b>Name</b>          | <b>Institution(s)</b>                                                    |
|----------------------|--------------------------------------------------------------------------|
| Manson, JoAnn        | Brigham & Women's Hospital                                               |
| Margolin, Lauren     | The Broad Institute                                                      |
| Martin, Lisa         | George Washington University                                             |
| Mathai, Susan        | University of Colorado at Denver                                         |
| Mathias, Rasika      | Johns Hopkins University                                                 |
| McArdle, Patrick     | University of Maryland                                                   |
| McDonald, Merry-Lynn | University of Alabama                                                    |
| McFarland, Sean      | Harvard University                                                       |
| McGarvey, Stephen    | Brown University                                                         |
| Mei, Hao             | University of Mississippi                                                |
| Meyers, Deborah A    | University of Arizona                                                    |
| Mikulla, Julie       | National Heart, Lung, and Blood Institute, National Institutes of Health |
| Min, Nancy           | University of Mississippi                                                |
| Minear, Mollie       | National Heart, Lung, and Blood Institute, National Institutes of Health |
| Minster, Ryan L      | University of Pittsburgh                                                 |
| Mitchell, Braxton    | University of Maryland                                                   |
| Montasser, May E.    | University of Maryland                                                   |
| Musani, Solomon      | University of Mississippi                                                |
| Mwasongwe, Stanford  | University of Mississippi                                                |
| Mychaleckyj, Josyf C | University of Virginia                                                   |
| Nadkarni, Girish     | Icahn School of Medicine at Mount Sinai                                  |
| Naik, Rakhi          | Johns Hopkins University                                                 |
| Natarajan, Pradeep   | The Broad Institute, Harvard University, Massachusetts General Hospital  |
| Nekhai, Sergei       | Howard University                                                        |
| Nickerson, Deborah   | University of Washington                                                 |
| North, Kari          | University of North Carolina                                             |
| O'Connell, Jeff      | University of Maryland                                                   |
| O'Connor, Tim        | University of Maryland                                                   |
| Ochs-Balcom, Heather | University at Buffalo                                                    |
| Pankow, James        | University of Minnesota                                                  |
| Papanicolaou, George | National Heart, Lung, and Blood Institute, National Institutes of Health |
| Parker, Margaret     | Brigham & Women's Hospital                                               |
| Parsa, Afshin        | University of Maryland                                                   |
| Penchev, Sara        | National Jewish Health                                                   |

| <b>Name</b>             | <b>Institution(s)</b>                                                    |
|-------------------------|--------------------------------------------------------------------------|
| Peralta, Juan Manuel    | University of Texas Rio Grande Valley School of Medicine                 |
| Perez, Marco            | Stanford University                                                      |
| Perry, James            | University of Maryland                                                   |
| Peters, Ulrike          | Fred Hutchinson Cancer Research Center, University of Washington         |
| Peysen, Patricia        | University of Michigan                                                   |
| Phillips, Larry         | Emory University                                                         |
| Phillips, Sam           | University of Washington                                                 |
| Pollin, Toni            | University of Maryland                                                   |
| Post, Wendy             | Johns Hopkins University                                                 |
| Powers Becker, Julia    | University of Colorado at Denver                                         |
| Preethi Boorgula, Meher | University of Colorado at Denver                                         |
| Preuss, Michael         | Icahn School of Medicine at Mount Sinai                                  |
| Prokopenko, Dmitry      | Harvard University                                                       |
| Psaty, Bruce            | University of Washington                                                 |
| Qasba, Pankaj           | National Heart, Lung, and Blood Institute, National Institutes of Health |
| Qiao, Dandi             | Brigham & Women's Hospital                                               |
| Qin, Zhaohui            | Emory University                                                         |
| Rafaels, Nicholas       | University of Colorado at Denver                                         |
| Raffield, Laura         | University of North Carolina                                             |
| Ramachandran, Vasam     | Boston University                                                        |
| Rao, D.C.               | Washington University in St Louis                                        |
| Rasmussen-Torvik, Laura | Northwestern University                                                  |
| Ratan, Aakrosh          | University of Virginia                                                   |
| Redline, Susan          | Brigham & Women's Hospital                                               |
| Reed, Robert            | University of Maryland                                                   |
| Regan, Elizabeth        | National Jewish Health                                                   |
| Reiner, Alex            | Fred Hutchinson Cancer Research Center, University of Washington         |
| Rice, Ken               | University of Washington                                                 |
| Rich, Stephen           | University of Virginia                                                   |
| Roden, Dan              | Vanderbilt University                                                    |
| Roselli, Carolina       | The Broad Institute                                                      |
| Rotter, Jerome          | Los Angeles Biomedical Research Institute                                |
| Ruczinski, Ingo         | Johns Hopkins University                                                 |
| Russell, Pamela         | University of Colorado at Denver                                         |
| Ruuska, Sarah           | Blood Works Northwest                                                    |

| <b>Name</b>              | <b>Institution(s)</b>                     |
|--------------------------|-------------------------------------------|
| Ryan, Kathleen           | University of Maryland                    |
| Sakornsakolpat, Phuwanat | Brigham & Women's Hospital                |
| Salimi, Shabnam          | University of Maryland                    |
| Salzberg, Steven         | Johns Hopkins University                  |
| Sadow, Kevin             | Los Angeles Biomedical Research Institute |
| Sankaran, Vijay          | Harvard University                        |
| Scheller, Christopher    | University of Michigan                    |
| Schmidt, Ellen           | University of Michigan                    |
| Schwander, Karen         | Washington University in St Louis         |
| Schwartz, David          | University of Colorado at Denver          |
| Sciurba, Frank           | University of Pittsburgh                  |
| Seidman, Christine       | Harvard Medical School                    |
| Sheehan, Vivien          | Baylor College of Medicine                |
| Shetty, Amol             | University of Maryland                    |
| Shetty, Aniket           | University of Colorado at Denver          |
| Sheu, Wayne Hui-Heng     | Taichung Veterans General Hospital Taiwan |
| Shoemaker, M. Benjamin   | Vanderbilt University                     |
| Silver, Brian            | UMass Memorial Medical Center             |
| Silverman, Edwin         | Brigham & Women's Hospital                |
| Smith, Jennifer          | University of Michigan                    |
| Smith, Josh              | University of Washington                  |
| Smith, Nicholas          | University of Washington                  |
| Smith, Tanja             | New York Genome Center                    |
| Smoller, Sylvia          | Albert Einstein College of Medicine       |
| Snively, Beverly         | Wake Forest Baptist Health                |
| Sofer, Tamar             | Brigham & Women's Hospital                |
| Sotoodehnia, Nona        | University of Washington                  |
| Stilp, Adrienne          | University of Washington                  |
| Streeten, Elizabeth      | University of Maryland                    |
| Sung, Yun Ju             | Washington University in St Louis         |
| Sylvia, Jody             | Brigham & Women's Hospital                |
| Szpiro, Adam             | University of Washington                  |
| Sztalryd, Carole         | University of Maryland                    |
| Taliun, Daniel           | University of Michigan                    |
| Tang, Hua                | Stanford University                       |
| Taub, Margaret           | Johns Hopkins University                  |
| Taylor, Kent             | Los Angeles Biomedical Research Institute |

| <b>Name</b>          | <b>Institution(s)</b>                                      |
|----------------------|------------------------------------------------------------|
| Taylor, Simeon       | University of Maryland                                     |
| Telen, Marilyn       | Duke University                                            |
| Thornton, Timothy A. | University of Washington                                   |
| Tinker, Lesley       | Women's Health Initiative                                  |
| Tirschwell, David    | University of Washington                                   |
| Tiwari, Hemant       | University of Alabama                                      |
| Tracy, Russell       | University of Vermont                                      |
| Tsai, Michael        | University of Minnesota                                    |
| Vaidya, Dhananjay    | Johns Hopkins University                                   |
| VandeHaar, Peter     | University of Michigan                                     |
| Vrieze, Scott        | University of Colorado at Boulder, University of Minnesota |
| Walker, Tarik        | University of Colorado at Denver                           |
| Wallace, Robert      | University of Iowa                                         |
| Walts, Avram         | University of Colorado at Denver                           |
| Wan, Emily           | Brigham & Women's Hospital                                 |
| Wang, Fei Fei        | University of Washington                                   |
| Watson, Karol        | University of California, Los Angeles                      |
| Weeks, Daniel E.     | University of Pittsburgh                                   |
| Weir, Bruce          | University of Washington                                   |
| Weiss, Scott         | Brigham & Women's Hospital                                 |
| Weng, Lu-Chen        | Massachusetts General Hospital                             |
| Willer, Cristen      | University of Michigan                                     |
| Williams, Kayleen    | University of Washington                                   |
| Williams, L. Keoki   | Henry Ford Health System                                   |
| Wilson, Carla        | Brigham & Women's Hospital                                 |
| Wilson, James        | University of Mississippi                                  |
| Wong, Quenna         | University of Washington                                   |
| Xu, Huichun          | University of Maryland                                     |
| Yanek, Lisa          | Johns Hopkins University                                   |
| Yang, Ivana          | University of Colorado at Denver                           |
| Yang, Rongze         | University of Maryland                                     |
| Zaghloul, Norann     | University of Maryland                                     |
| Zekavat, Maryam      | The Broad Institute                                        |
| Zhang, Yingze        | University of Pittsburgh                                   |
| Zhao, Snow Xueyan    | National Jewish Health                                     |
| Zhao, Wei            | University of Michigan                                     |
| Zheng, Xiuwen        | University of Washington                                   |

| <b>Name</b>         | <b>Institution(s)</b>                 |
|---------------------|---------------------------------------|
| Zhi, Degui          | University of Texas Health at Houston |
| Zhou, Xiang         | University of Michigan                |
| Zody, Michael       | New York Genome Center                |
| Zoellner, Sebastian | University of Michigan                |
